# Supplementary material for: Human cis-acting elements regulating escape from X-chromosome inactivation function in mouse
Source: PubMed Central journal article supplement — Hum Mol Genet. 2018 Feb 1;27(7):1252–62. doi: 10.1093/hmg/ddy039 (PMC6159535; doi:10.1093/hmg/ddy039), 2018-02-01
Supplement: ddy039_peeters_supplementary_information_hmg.pdf [file ddy039_peeters_supplementary_information_hmg.pdf]

**Human *cis*-acting elements regulating escape from X-chromosome inactivation function in mouse**

Samantha B Peeters, Andrea J Korecki, Elizabeth M Simpson, and Carolyn J Brown

**Supplementary Information**

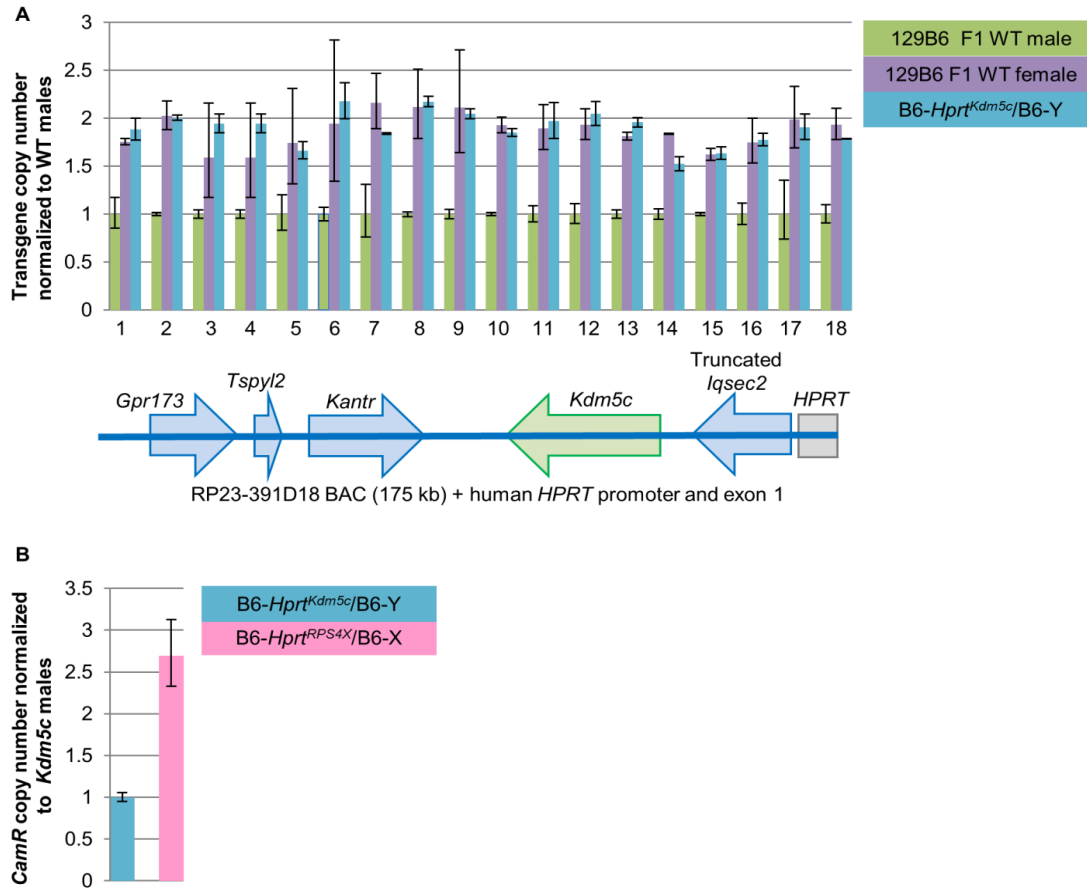

**S1 Fig. Copy number analyses suggest single-copy integration of RP23-391D18 and double integration of RP11-1145H7. A)** 18 qPCR assays approximately every 10 kb along the *Kdm5c*-containing BAC were generated to test for copy number of the integration. N2 transgenic males with an endogenous and transgenic copy on their Xa were compared to wild-type males with one endogenous copy, and wild-type females with 2 endogenous copies. The N2 transgenic males more closely resembled wild-type females with 2 copies suggesting that indeed only one copy of the transgene had integrated. Each bar is an average of 2 mice per genotype. **B)** N1 females with the *RPS4X* transgene were tested for copy number by comparing the copy number of a gene, *CamR*, in the construct that is common between both the *RPS4X* and *Kdm5c* BACs. As we had determined the *Kdm5c* transgene to be single-copy in A), we normalized 6 *RPS4X* females to 2 *Kdm5c* males which indicated at least 2 copies of the *RPS4X* transgene had been integrated.

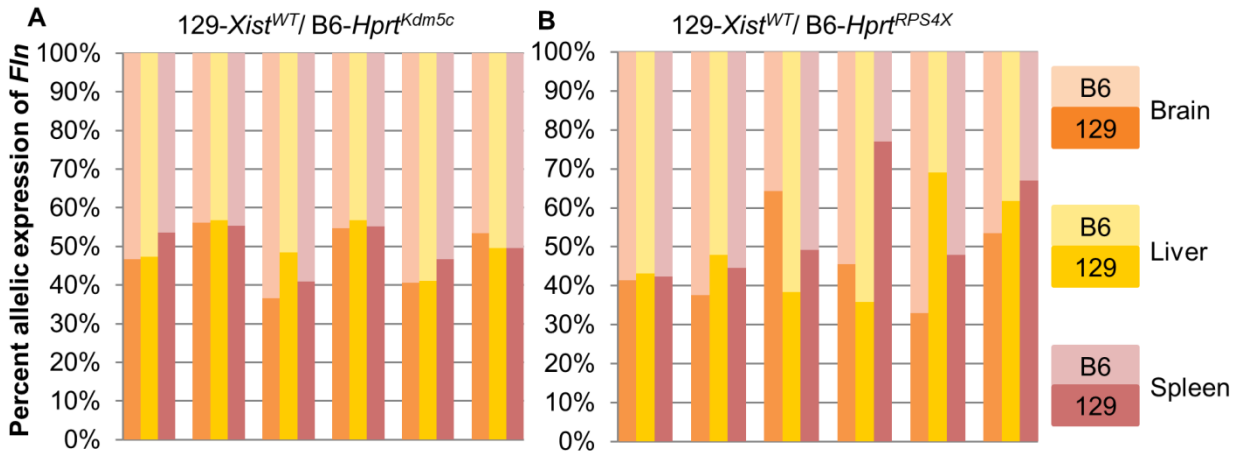

**S2 Fig. *Xist*<sup>WT</sup> females do not have skewed XCI.** Percent allelic expression of X-linked gene *Fln* in **A)** six female mice carrying *Kdm5c* transgene and **B)** six female mice carrying *RPS4X* transgene, all with wild-type *Xist* and random XCI. All three tissues are shown for each mouse with the percent expression indicating how often the B6 or 129 X is the Xa.

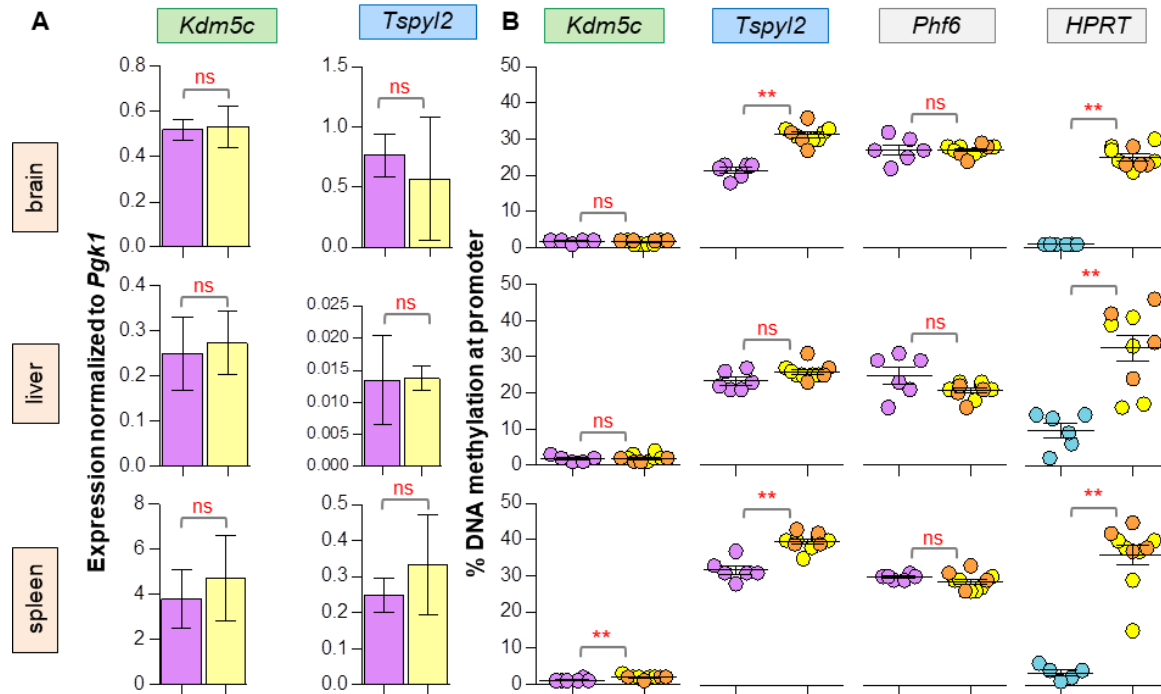

**S3 Fig. Analysis of additional 129-*Xist*<sup>1lox</sup>/B6-*Hprt*<sup>Kdm5c</sup> mice supports escape of *Kdm5c* by DNAm. **A)** Normalized to *Pgk1*, RT-qPCR of *Kdm5c* and *Tspyl2* expression in average of six original wild-type females (purple) compared to average of six original Xi knock-in females (analyzed in Fig 1) plus four additional Xi knock-in females (yellow). **B)** Average DNAm of *Kdm5c* shows promoter hypomethylation in four additional knock-in females (orange) consistent original six Xi knock-in females (yellow) also plotted. *Tspyl2*, *HPRT* and *Phf6* also shown (Mann-Whitney t-test, significance denoted by asterisks; p-value <0.001 \*\*\*, 0.001 to 0.01 \*\*, 0.01 to 0.05 \*, >0.05 ns). Knock-in females are compared to wild-type females for all assays except *HPRT* (compared to knock-in males, blue) as wild-type females do not carry the human gene.**

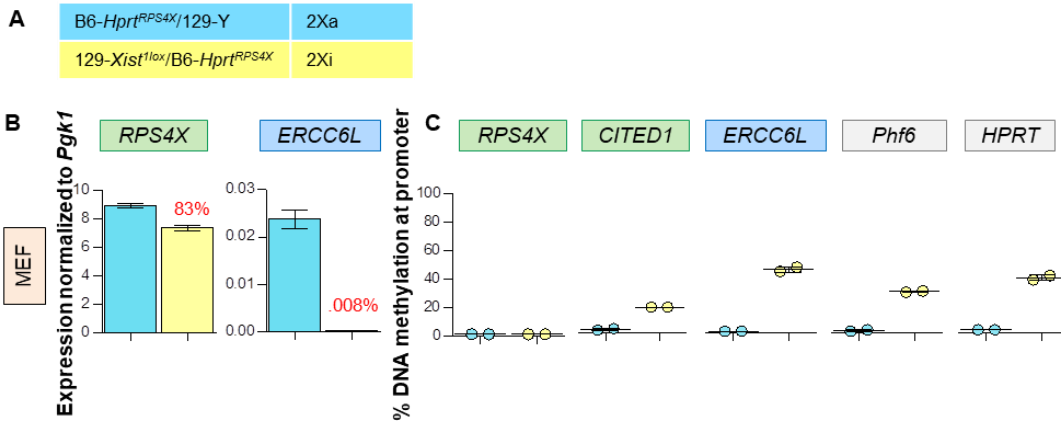

**S4 Fig. *ERCC6L* is subject to XCI in mouse embryonic fibroblasts (MEFs). A)**

Description of genotypes, n=2 for each. **C)** Normalized to *Pgk1*, RT-qPCR of *RPS4X* and *ERCC6L* expression shows that the transgenes are both active on a male X in MEFs. When on the Xi in MEFs, *RPS4X* escapes at high levels while *ERCC6L* lacks expression in these females indicating it is subject to XCI. Expression from female Xi is shown as percentage of the male X (red text). **D)** Average DNAm of skewed knock-in females shows a hypomethylated *RPS4X* promoter, *CITED1* in the uncallable range, and *ERCC6L*, *HPRT* and *Phf6* hypermethylated compared to knock-in males. While not statistically significant due to low sample size, the data is similar to other tissues examined and supports *ERCC6L* being subject to XCI in mouse.

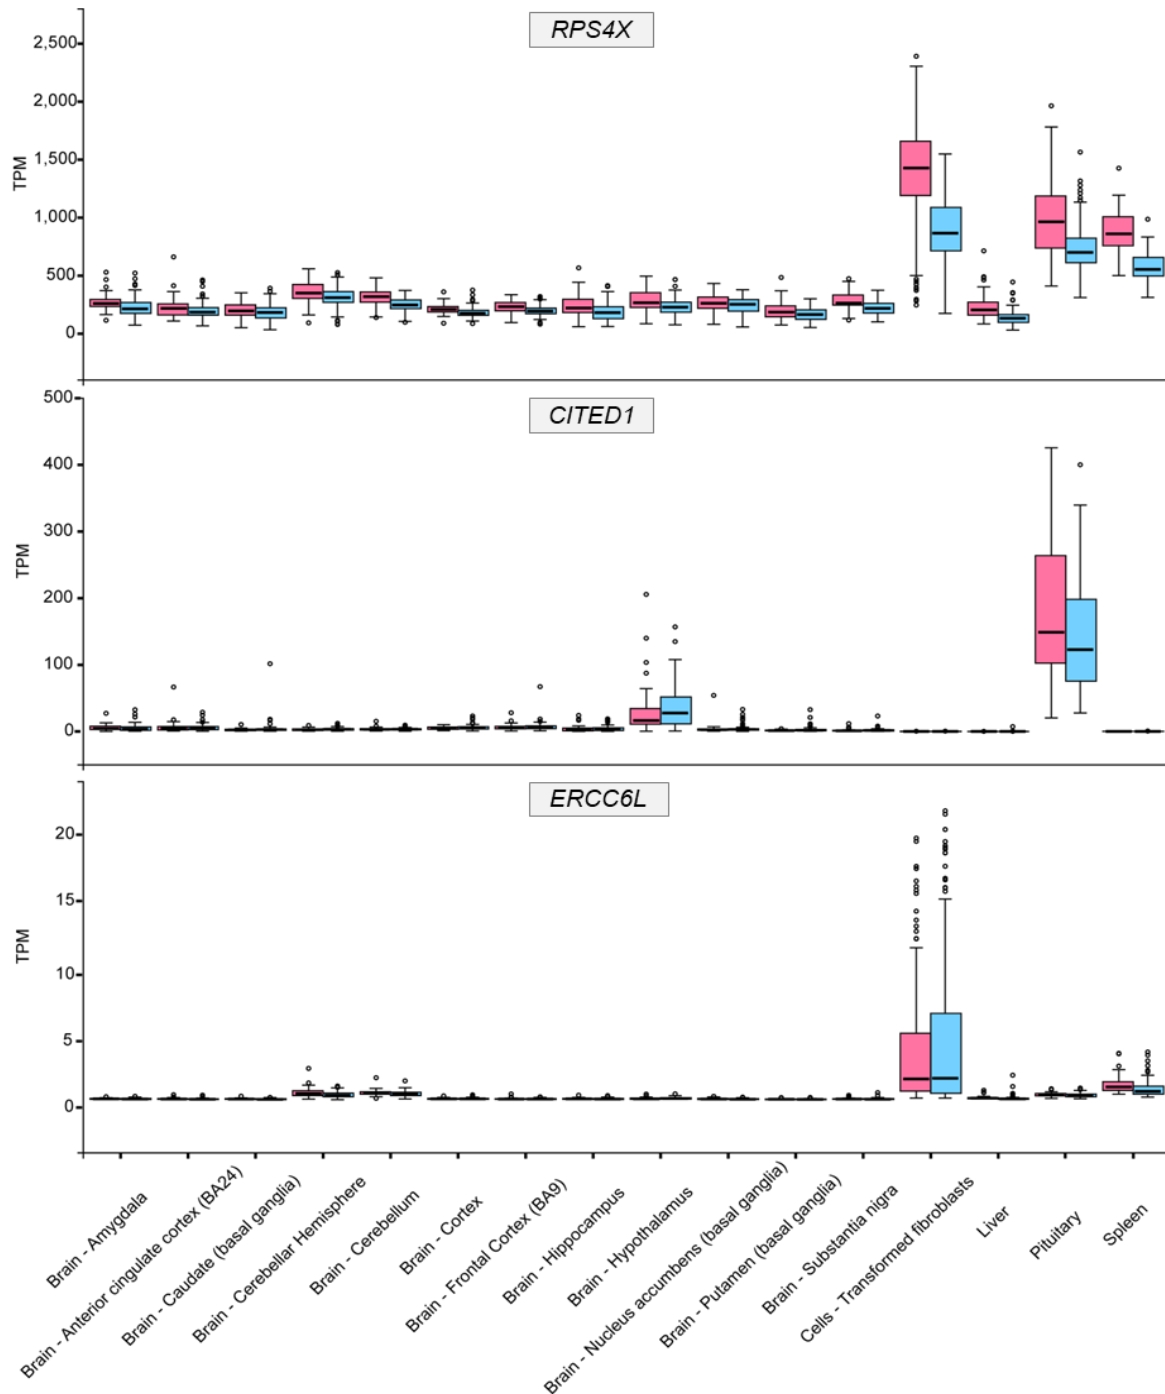

**S5 Fig. RP11-1145H7 region expression and DNAm in human.** *RPS4X* is broadly expressed in all human tissues corresponding to the tissues we examined in mouse. *CITED1* and *ERCC6L* are limited in their expression for the tissues examined. Males shown in blue, females with random XCI in pink (GTEx Portal).

**S1 Table. Experimental crosses yield normal sex and genotype ratios.** 129-*Xist*<sup>1lox</sup>/X females were crossed to B6-*Hprt*<sup>BAC</sup>/Y males to generate F1 129-*Xist*<sup>1lox</sup>/B6-*Hprt*<sup>BAC</sup> and F1 129-*Xist*<sup>WT</sup>/B6-*Hprt*<sup>BAC</sup> experimental females. Neither male to female ratio nor female *Xist*<sup>WT</sup> to *Xist*<sup>1lox</sup> is significantly different from expected (chi-square test, 0.05 significance level) suggesting that the additional expression from the BAC genes in females, and specifically the *Xist*<sup>WT</sup> mice, did not have a deleterious effect on breeding or significantly skew the ratios of offspring.

***Kdm5c* experimental cross**

|            | male  | female | <i>Xist</i> <sup>WT</sup> | <i>Xist</i> <sup>1lox</sup> |
|------------|-------|--------|---------------------------|-----------------------------|
| Total mice | 38    | 33     | 18                        | 15                          |
| Chi-square | 0.352 |        | 0.273                     |                             |
| P-value    | 0.553 |        | 0.602                     |                             |

***RPS4X* experimental cross**

|            | male  | female | <i>Xist</i> <sup>WT</sup> | <i>Xist</i> <sup>1lox</sup> |
|------------|-------|--------|---------------------------|-----------------------------|
| Total mice | 71    | 54     | 26                        | 25                          |
| Chi-square | 2.312 |        | 0.02                      |                             |
| P-value    | 0.128 |        | 0.889                     |                             |

**S2 Table. Primer table.**

| <b>Experiment</b>                               | <b>Assay</b>             | <b>Sequence</b>         |
|-------------------------------------------------|--------------------------|-------------------------|
| BAC retrofit junction PCR                       | 3'retrofit_F1            | AAGCCTTCGCGAAAGAAAAT    |
|                                                 | 3'retrofit_R2            | AACCTGGGTAACATGGTGAGA   |
|                                                 | 5'retrofit_F1            | TCCTTAAGCCCCACTAGGT     |
|                                                 | 5'retrofit_R1            | TGTCCTTTGTTACAGGCCAGA   |
| <i>Hprt</i> integration and BAC backbone vector | 5'CamR oEMS4863          | TGGCAATGAAAGACGGTGAGC   |
|                                                 | 5'CamR oEMS4864          | GCATCAGCACCTTGTGCGCT    |
|                                                 | Hprt Correction oEMS2267 | TCAGGCGAACCTCTCGGCTT    |
|                                                 | Hprt Correction oEMS2269 | TGCTGGACATCCCTACTAACCCA |
|                                                 | Hprt WT oEMS2236         | TCCAGGGAATCCATCACAAT    |
|                                                 | Hprt WT oEMS2238         | CCAGTGCTGACGTTACAAGC    |
|                                                 | Hprt Null oEMS2236       | TCCAGGGAATCCATCACAAT    |
|                                                 | Hprt Null oEMS2240       | GGCATCCAGTGCTCTTCACT    |
| RP23-391D18 BAC copy-number qPCR                | qRP23-391D18_F1          | CTACTTCTGGGCAGGTGGTC    |
|                                                 | qRP23-391D18_R1          | GGAATGCCACTTCCTAGCCT    |
|                                                 | qRP23-391D18_F2          | CACCTGTCTTCACTTCCCCA    |
|                                                 | qRP23-391D18_R2          | CAGCCATAAGCCAGGTGTA     |
|                                                 | qRP23-391D18_F3          | CAGACTCCCATGTGCAAGGA    |
|                                                 | qRP23-391D18_R3          | TGCTACACACATTCTGACCA    |
|                                                 | qRP23-391D18_F4          | CGCTCCCTTTGTTGTCAGTG    |
|                                                 | qRP23-391D18_R4          | ACCGATGCCAATGAGAACCT    |
|                                                 | qRP23-391D18_F5          | TGGAGGTTAGTTGCCAGCAT    |
|                                                 | qRP23-391D18_R5          | CTGGAGGAGGAGTTACAGGC    |
|                                                 | qRP23-391D18_F6          | CTTTCCTGCTGGAGCGA       |
|                                                 | qRP23-391D18_R6          | CGGGGCTCAATAATGGCTTG    |
|                                                 | qRP23-391D18_F7          | CATAGCCAAACATGCCCCAG    |
|                                                 | qRP23-391D18_R7          | AGAGAGTACAAAGGCTGGCC    |
|                                                 | qRP23-391D18_F8          | CAGTCGGAGGAGTCTGTGTT    |
|                                                 | qRP23-391D18_R8          | CCCCATCCCAACCTGTTACA    |
|                                                 | qRP23-391D18_F9          | TCACCTCCTTCTTGAGCTCC    |
|                                                 | qRP23-391D18_R9          | CTGCCACTTTGCTGCTCA      |
|                                                 | qRP23-391D18_F10         | GTGTGAGTTTCCAGACCTGC    |
|                                                 | qRP23-391D18_R10         | ACTGTTCCATCATGTCCGCT    |
|                                                 | qRP23-391D18_F11         | GAGGACCAGGATGGCTTAGAA   |
|                                                 | qRP23-391D18_R11         | CCGGGAAGTCAGAGTAGAGAAA  |
|                                                 | qRP23-391D18_F12         | GATCCTGGCCACTTTCCTCA    |
| qRP23-391D18_R12                                | TCTGCAGGAAACGACCCAG      |                         |
| qRP23-391D18_F13                                | AACTGTGGAGTATGGGGCTG     |                         |



|                        |                         |                        |
|------------------------|-------------------------|------------------------|
| qRP23-391D18_R13       | GGAAACCGCTGCCAAATTCT    |                        |
| qRP23-391D18_F14       | GAGGAAGGAGCAGGGATGAG    |                        |
| qRP23-391D18_R14       | ACACCTTCCATCTGAACCCC    |                        |
| qRP23-391D18_F15       | AGCTGTACGGTGTTAGTGGT    |                        |
| qRP23-391D18_R15       | CAGATCCAACCTGCCTCTGT    |                        |
| qRP23-391D18_F16       | ACAGCTTCCGTCAGTCCTTT    |                        |
| qRP23-391D18_R16       | GCTAGGGTTCAAGAGGGGAC    |                        |
| qRP23-391D18_F17       | TCAGGGCCTATGTCTGAGGA    |                        |
| qRP23-391D18_R17       | TGTGGCTGAGCTGTCTTCTT    |                        |
| qRP23-391D18_18F       | GGGAGTGGGATACGAAGAGAA   |                        |
| qRP23-391D18_18R       | CCTTACTGTCCCTCCCTGAATA  |                        |
| qHbb-bs_F (control)    | CTGCTCACACAGGATAGAGAGGG |                        |
| qHbb-bs_R (control)    | GCAAATGTGAGGAGCAACTGATC |                        |
| qCamR_F (BAC backbone) | TCCCAATGGCATCGTAAAGAA   |                        |
| qCamR_R (BAC backbone) | CAGCTGAACGGTCTGGTTATAG  |                        |
| RP11-1145H7 BAC PCR    | RP11-1145H7_F1          | CAAACCTTTTCTGTAGCTTG   |
|                        | RP11-1145H7_R1          | TGAAGTCTCATTCTGTCATC   |
|                        | RP11-1145H7_F2          | CTTAACAATGGAGTTTGGAG   |
|                        | RP11-1145H7_R2          | CACAGTCTATCTTTGGATTG   |
|                        | RP11-1145H7_F3          | CTGTCCTCTCAACAAGAAC    |
|                        | RP11-1145H7_R3          | ACATCTGTTGTGTCTAATGC   |
|                        | RP11-1145H7_F4          | ATTGGGACGGTATCCAGTAAGA |
|                        | RP11-1145H7_R4          | TGGGCTTGAGTCCCTGTAAT   |
|                        | RP11-1145H7_F5          | CAGATTGTAATCACTGAACC   |
|                        | RP11-1145H7_R5          | TTAGTATGGGGTTTCACC     |
|                        | RP11-1145H7_F6          | GCCTGTAATCTCAGCTACTC   |
|                        | RP11-1145H7_R6          | TGTCAGCTGCTTTCTATATC   |
|                        | RP11-1145H7_F7          | ATCATCTCTTTCCCTCATC    |
|                        | RP11-1145H7_R7          | TTTAAGACAGGGTTTCACTC   |
|                        | RP11-1145H7_F8          | ATAGAGTGGTGAACAAGATG   |
|                        | RP11-1145H7_R8          | CATCAACCTTCTGAGTAGC    |
|                        | RP11-1145H7_F9          | TCCTCAGACTAGAGAGAAGG   |
|                        | RP11-1145H7_R9          | AGTACATGTGAGATGGATTG   |
|                        | RP11-1145H7_F10         | CTGTAATCCCAGTTACTCAG   |
|                        | RP11-1145H7_R10         | ATAACAAGTGTTGGTGAGC    |
|                        | RP11-1145H7_F11         | CATATGATCCATCTTGGTC    |
|                        | RP11-1145H7_R11         | CTGTAATCTCAGCACTTTG    |
|                        | RP11-1145H7_F12         | TGAGTTAGAATCAAGACCAG   |
|                        | RP11-1145H7_R12         | TGAGTAGCTGAGACTACAGG   |
|                        | RP11-1145H7_F13         | CAAGAATTGGGTCTAGTTG    |

|                                        |                         |                                           |
|----------------------------------------|-------------------------|-------------------------------------------|
|                                        | RP11-1145H7_R13         | TCTTTCCAGTCCTATATTCC                      |
|                                        | RP11-1145H7_F14         | CTCCTTGGCTAAGTTTATTC                      |
|                                        | RP11-1145H7_R14         | AACGATCTCTGTCTCAATG                       |
|                                        | RP11-1145H7_F15         | CATCTTATGAGTTGTGAAGC                      |
|                                        | RP11-1145H7_R15         | AATTAACTGGAGAGTGAGG                       |
|                                        | RP11-1145H7_F16         | GGTCTTTGATATTGCTTGTC                      |
|                                        | RP11-1145H7_R16         | GTCCTGACTTTTCTACTCTGC                     |
|                                        | RP11-1145H7_F17         | ACTCAAAGGTAGGAGAACTG                      |
|                                        | RP11-1145H7_R17         | AATCAGCTCTAAAGTGTTCC                      |
| DNA methylation PCR and pyrosequencing | DNAmHPRT_F              | GGAATTAGGGAGTTTTTTGAATAGG                 |
|                                        | DNAmHPRT_R              | /5Biosg/CCTACCAATTTACAACTCACTAAATA        |
|                                        | DNAmHPRT_S              | GGGAGGGAAAGGGGT                           |
|                                        | DNAmPhf6_F              | /5Biosg/GTGGTTTTTTTTATTGTTAGGGATTTT       |
|                                        | DNAmPhf6_R              | GAAATATTGGGATGGGGGTTTT                    |
|                                        | DNAmPhf6_S              | ATAGAGGTTGGYGATTT                         |
|                                        | DNAmKdm5c_F             | GTAAGGTTGGGAGTTGATGG                      |
|                                        | DNAmKdm5c_R             | /5Biosg/CCCATATTCTTCCCACACCTACTA          |
|                                        | DNAmKdm5c_S             | GTAAGGTTGGGAGTTGA                         |
|                                        | DNAmTspyl2_F            | TGAGGGGTAGTTAGTTTGATGA                    |
|                                        | DNAmTspyl2_R            | /5Biosg/CTCAACCCCTACCTTCTCT               |
|                                        | DNAmTspyl2_S            | GGGTAGTTAGTTTGATGATT                      |
|                                        | DNAmRPS4X_F             | ATTAGTAGATGGTAAGAAAGAGTT                  |
|                                        | DNAmRPS4X_R             | /5Biosg/CCCAACTCAACCCTTACT                |
|                                        | DNAmRPS4X_S             | AGATGGTAAGAAAGATTT                        |
|                                        | DNAmERRC6L_F            | GGGTAGTTTTTTTTATTTATAATGATGGTA            |
|                                        | DNAmERRC6L_R            | /5Biosg/TTCAATCCAATTCAAACCATACTACA        |
|                                        | DNAmERRC6L_S            | TTTTTTTTATTTATAATGATGGTAT                 |
|                                        | DNAmCITED_F             | AAGTGGAATTTATTGGGTAAGTT                   |
|                                        | DNAmCITED_R             | /5Biosg/CCTAACCAATACCCCACTTCTAAAATAT<br>C |
| DNAmCITED_S                            | GTGGAATTTATTGGGTAAGTTTA |                                           |
| SNP PCR and pyrosequencing             | Fln_F                   | /5Biosg/CCAGCTTCCCTAGTCCAAATGC            |
|                                        | Fln_R                   | TGCATACAGTCAGTGCAAGTACAAG                 |
|                                        | Fln_S                   | CCTAGAGAGGGCTGAA                          |
| Expression RT-qPCR                     | qPgk1_F (control)       | CGTCTGCCGCGCTGTT                          |
|                                        | qPgk1_R (control)       | AACACCGTGAGGTCGAAAGG                      |
|                                        | qKdm5c_F                | GCGACTGGGACTTAACTGTAG                     |
|                                        | qKdm5c_R                | TCCGTTTCTTCCACACCTTAC                     |
|                                        | qTspyl2_F               | GGATGACAAGGAGAGTGTGAGG                    |
|                                        | qTspyl2_R               | TCTGGATGAATTTGCGCTTGAG                    |

|           |                           |
|-----------|---------------------------|
| qRPS4X_F  | CAAGGTCCGAACTGATATAACCTAC |
| qRPS4X_R  | GGAAATTCTCTCCCGTCTTGTC    |
| qCITED_F  | GGCAGAATCACTCTCTCCTTCT    |
| qERCC6L_F | GGCTGAGGCTGTGGTTTATT      |
| qERCC6L_R | CCTGGCTAAGAGAACCTGTATTTTC |

**All PCR and qPCR primers were designed using the PrimerQuest Tool (IDT) and tested for specificity by In-Silico PCR (UCSC). All pyrosequencing primers were designed using PyroMark Assay Design software (Qiagen).**
